# Supplementary material
Source: publisher site journal article supplement (https://www.dovepress.com/article/473088)
Supplement: Supplementary file 1 [file get_supplementary_file.php]

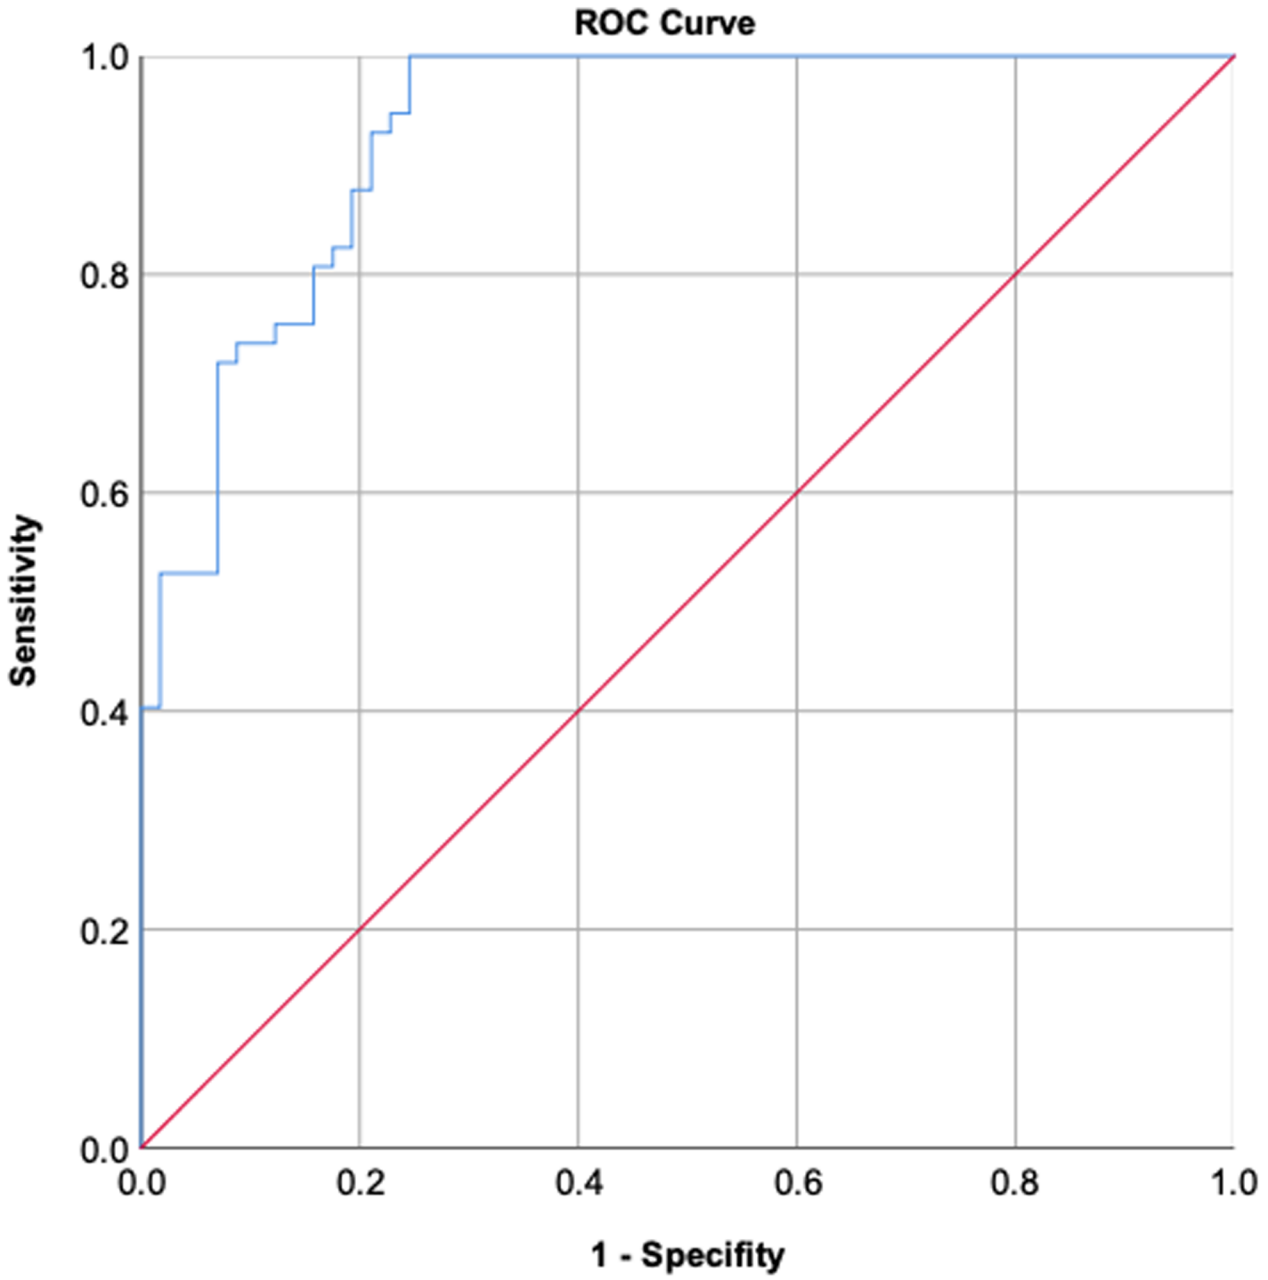


**Supplementary Figure 1** ROC Curve of Patients with CRAB HAP infections in TGC Combination with CPS Regimen

**Abbreviations:** CRAB, carbapenem-resistant *Acinetobacter baumannii*; HAP, hospital-acquired pneumonia; TGC, tigecycline; CPS, cefoperazone/sulbactam.

**Supplementary Table 1** Characteristics of Patients with CRAB HAP Receiving Different Doses of TGC Monotherapy Regimens

| Characteristics | SDT  n = 43 | HDT  n= 52 | *P* value |
| --- | --- | --- | --- |
| Gender, Male, n (%) | 28 (65.1) | 37 (71.2) | 0.529 |
| Age/years (M±SD) | 67.2 ± 16.6 | 64.6 ± 13.1 | 0.402 |
| BMI (IQR) | 21.9 (20.6, 3.7) | 21.3 (19.9, 24.6) | 0.731 |
| BMI, n(%) |  |  |  |
| <24 | 33 (76.7) | 36 (69.2) | 0.442 |
| [24,27.9] | 9 (20.9) | 12 (23.1) |  |
| ≧28 | 1 (2.3) | 4 (7.7) |  |
| CCI score (IQR) | 1 (0, 2) | 2 (0, 3) | 0.446 |
| CCI score, n(%) |  |  |  |
| <2 | 25 (58.1) | 25 (48.1) | 0.328 |
| ≧2 | 18 (41.9) | 27 (51.9) |  |
| SOFA score (IQR) | 5 (4, 11) | 5 (5, 8) | 0.994 |
| SOFA score, n(%) |  |  |  |
| <7 | 28 (65.1) | 33 (63.5) | 0.867 |
| ≧7 | 15 (34.9) | 19 (36.5) |  |
| ICU admission, n(%) | 27 (62.8) | 27 (51.9) | 0.287 |
| MV, n(%) | 19 (44.2) | 24 (46.2) | 0.848 |
| CRRT, n(%) | 4 (9.3) | 1 (1.9) | 0.254 |
| Shock, n(%) | 16 (37.2) | 17 (32.7) | 0.645 |

**Notes:** Data are the number (%) of patients, median (interquartile range, IQR), or mean ± standard (M±SD) deviation.

**Abbreviations:** CRAB, carbapenem-resistant *Acinetobacter baumannii*; HAP, hospital-acquired pneumonia; TGC, tigecycline; SDT, standard-dose-tigecycline; HDT, High-Dose-tigecycline; BMI, Body Mass Index; CCI, Charlson comorbidity index; SOFA, Sequential Organ Failure Assessment; ICU, intensive care unit; MV, Mechanical Ventilation; CRRT, Continuous Renal Replacement Therapy.

**Supplementary Table 2** The Clinical Outcome of Different Doses of TGC Monotheraphy Regimens

| Characteristics | SDT  n= 43 | HDT  n = 52 | *P* value |
| --- | --- | --- | --- |
| Baseline (IQR) |  |  |  |
| WBC, ×109/L | 26 (23.4, 32) | 27.3 (20.2, 35.6) | 0.814 |
| CRP, mg/dL | 70.9 (56.4, 110) | 72.5 (41, 124) | 0.123 |
| PCT, ng/mL | 7.8 (3.9, 13) | 4.7 (3.6, 10.9) | 0.285 |
| ALT, U/L | 9.6 (7.95, 11.5) | 8.9 (7.6, 15.1) | 0.942 |
| TBIL, μmol/L | 1.32 (1.21, 2.07) | 1.27 (1.2, 3.0) | 0.172 |
| Cr, μmol/L | 63.1 (56, 68) | 64.3 (53.6, 67.4) | 0.588 |
| Hb, g/L | 96 (89.5, 111.5) | 96 (90, 106) | 0.799 |
| PLT, ×109/L | 269 (114, 316) | 332.5 (146, 359) | 0.917 |
| Variation (IQR) |  |  |  |
| WBC, ×109/L | 9 (2, 10) | 9.09 (4.02, 12.55) | 0.860 |
| CRP, mg/dL | 46 (15.77, 70.5) | 46.6 (14, 68) | 0.981 |
| PCT, ng/mL | 4.1 (1.68, 8.2) | 2.05 (1.6, 6.38) | 0.550 |
| ALT, U/L | 25 (14.4, 31.7) | 28.25 (12.1, 52) | 0.759 |
| TBIL, μmol/L | 0.2 (0.145, 2.5) | 0.2 (0.13, 1.18) | 0.163 |
| Cr, μmol/L | 103 (42.5, 122) | 89.5 (42, 130) | 0.945 |
| Hb, g/L | 16 (13.5, 20) | 17 (11, 25) | 0.826 |
| PLT, ×109/L | 80 (72, 110) | 82.5 (75, 113) | 0.627 |
| LOS, days (IQR) | 24 (21, 44.5) | 26 (21.5, 38.5) | 0.994 |
| Thirty, Mortality, n (%) | 3 (7) | 3 (5.8) | 1 |
| Ninety, Mortality, n (%) | 9 (20.9) | 6 (11.5) | 0.211 |

**Notes:** Data are the number (%) of patients, median (interquartile range, IQR), or mean ± standard (M±SD) deviation.

**Abbreviations:** TGC, tigecycline; SDT, standard-dose-tigecycline; HDT, High-Dose-

tigecycline; WBC, white blood cell; CRP, C-reactive protein; PCT, procalcitonin; ALT, alanine aminotransferase; TBIL, total bilirubin; Cr, creatinine; Hb, hemoglobin; PLT, procalcitonin; LOS, length of hospital stays.

**Supplementary Table 3** Characteristics of Patients with CRAB HAP Receiving Different Doses of TGC Combined with CPS Regimens

| Characteristics | SDT with CPS  n= 59 | HDT with CPS  n= 26 | *P* value |
| --- | --- | --- | --- |
| Gender, Male, n(%) | 41 (69.5) | 22 (84.6) | 0.142 |
| Age/years (IQR) | 76 (63, 88) | 69.5 (59, 79) | 0.157 |
| BMI, M±SD | 22.6 ± 3.0 | 24.0 ± 4.3 | 0.09 |
| BMI, n(%) |  |  |  |
| <24 | 39 (66.1) | 16 (61.5) | 0.006****** |
| [24,27.9] | 20 (33.9) | 6 (23.1) |  |
| ≧28 | 0 (0) | 4 (15.4) |  |
| CCI score (IQR) | 3 (1, 4) | 2 (1, 3) | 0.324 |
| CCI score, n(%) |  |  |  |
| <2 | 23 (39) | 10 (38.5) | 0.964 |
| ≧2 | 36 (61) | 16 (61.5) |  |
| SOFA score, M±SD | 9.2 ± 3.4 | 7.9 ± 4.4 | 0.159 |
| SOFA acore, n(%) |  |  |  |
| <7 | 11 (18.6) | 12 (46.2) | 0.009****** |
| ≧7 | 48 (81.4) | 14 (53.8) |  |
| ICU admission, n(%) | 56 (94.9) | 22 (84.6) | 0.245 |
| MV, n(%) | 55 (93.2) | 19 (73.1) | 0.028***** |
| CRRT, n(%) | 17 (28.8) | 5 (19.2) | 0.353 |
| Shock, n(%) | 37 (62.7) | 12 (46.2) | 0.155 |

**Notes:** Data are the number (%) of patients, median (interquartile range, IQR), or mean ± standard (M±SD) deviation. ***** *P* < 0.05, ****** *P* < 0.01.

**Abbreviations:** CRAB, carbapenem-resistant *Acinetobacter baumannii*; HAP, hospital-acquired pneumonia; TGC, tigecycline, CPS, cefoperazone/sulbactam; SDT, standard-dose-TGC; HDT, High-Dose-TGC; BMI, Body Mass Index; CCI, Charlson comorbidity index; SOFA, Sequential Organ Failure Assessment; ICU, intensive care unit; MV, Mechanical Ventilation; CRRT, Continuous Renal Replacement Therapy.

**Supplementary Table 4** The Clinical Outcome of Different Dose TGC Combined with CPS Regimens

| Characteristics | SDT with CPS  n = 59 | HDT with CPS  n= 26 | *P* value |
| --- | --- | --- | --- |
| Baseline |  |  |  |
| WBC, M±SD, ×109/L | 19.15 ± 6.54 | 17.65 ± 6.02 | 0.322 |
| CRP, M±SD, mg/dL | 146.0 ± 92.1 | 143.8 ± 81.9 | 0.922 |
| PCT, IQR, ng/mL | 3 (0.65, 16.13) | 3.99 (0.42, 23.00) | 0.199 |
| ALT, IQR, U/L | 20 (10.5, 32.5) | 16.9 (8, 25) | 0.838 |
| TBIL, IQR, μmol/L | 3.04 (1.72, 5.7) | 7.81 (3, 13) | 0.108 |
| Cr, IQR, μmol/L | 48 (33.2, 73) | 47.5 (40, 71) | 0.939 |
| Hb, M±SD, g/L | 112.8 ± 22.2 | 116.4 ± 24.5 | 0.512 |
| PLT, M±SD, ×109/L | 309.97 ± 133.6 | 256.8 ± 103.4 | 0.075 |
| Variation (IQR) |  |  |  |
| WBC, ×109/L | 7.14 (4.25, 9.78) | 8.51 (3.9, 12.7) | 0.595 |
| CRP, mg/dL | 78.6 (18.5, 111.8) | 103.4 (11, 165.3) | 0.398 |
| PCT, ng/mL | 2.24 (0.41, 6.8) | 2.9 (0.14, 13) | 0.508 |
| ALT, U/L | 30 (6, 52) | 17.5 (11.3, 38) | 0.751 |
| TBIL, μmol/L | 2.1 (0.8, 5.9) | 5.95 (0.8, 14) | 0.289 |
| Cr, μmol/L | 23 (11.5, 44) | 50.65 (24, 80) | 0.555 |
| Hb, g/L | 13 (6, 52) | 24 (11, 27) | 0.632 |
| PLT, ×109/L | 132 (52.5, 208.5) | 128 (59, 221) | 0.919 |
| LOS, IQR, days | 31 (20.5, 47.0) | 30 (16, 36) | 0.310 |
| Thirty,Mortality, n(%) | (12, 20.3) | (2, 7.7) | 0.258 |
| Ninety,Mortality, n(%) | (18, 30.5) | (4, 15.4) | 0.142 |

**Notes:** Data are the number (%) of patients, median (interquartile range, IQR), or mean ± standard (M±SD) deviation.

**Abbreviations:** TGC, tigecycline; CPS, cefoperazone/sulbactam; SDT, standard-dose

-TGC; HDT, High-Dose-TGC; WBC, white blood cell; CRP, C-reactive protein; PCT, procalcitonin; ALT, alanine aminotransferase; TBIL, total bilirubin; Cr, creatinine; Hb, hemoglobin; PLT, procalcitonin; LOS, length of hospital stays.
